# Supplementary material
Source: PubMed Central journal article supplement (PMC3993336)
Supplement: JB.01392-13_zjb999093089so1.pdf [file JB.01392-13_zjb999093089so1.pdf]

## 1 SUPPLEMENTAL FIGURE LEGENDS

2

3 **FIG. S1.** Amino acid sequence alignment. Amino acid sequence alignment of  
4 the cytoplasmic loop regions of PomA (A) and the C-terminal regions of FliG  
5 (B) with residues mutated in this study. Residues shown in black boxes are  
6 residues that are conserved and are involved in torque generation of the  
7 H<sup>+</sup>-driven flagellar motor in *E. coli* as described previously (14). Residues  
8 shown in gray boxes are additional residues mutated in this study. Numbers  
9 over the arrowheads indicate the residue numbers of PomA or FliG of *V.*  
10 *alginolyticus* mutated in this study. The multiple sequence alignment was  
11 carried out by the Clustal Omega application at the European Bioinformatics  
12 Institute website (<http://www.ebi.ac.uk/Tools/msa/clustalo/>). *Va*, *V.*  
13 *alginolyticus*; *So*, *S. oneidensis*; *Bs*, *B. subtilis*; *Ec*, *E. coli*; *Tm*, *T. maritima*; *Aa*,  
14 *A. aeolicus*. MotP, Na<sup>+</sup>/K<sup>+</sup>-driven stator protein in *B. subtilis*; LafT, H<sup>+</sup>-driven  
15 stator protein in lateral flagella.

16

17 **FIG. S2.** Complementation of the *pomAB fliG* triple-mutant strain by wild-type  
18 *pomAB* and *fliG* genes on plasmids and detection of PomA and FliG proteins  
19 with mutations. (A) NMB301,  $\Delta pomAB\Delta fliG$  strain, was transformed with two  
20 plasmids, pSU41 (vector) or pYA303 (encoding the *pomAB* genes), and  
21 pMMB206 (vector) or pNT1 (encoding the *fliG* gene), and cells were inoculated  
22 in soft-agar plates and incubated at 30°C for 8 hr. (B) Expression of mutant  
23 PomA proteins. NMB301 cells harboring two plasmids, pSU41 or pYA303  
24 encoding wild-type or mutant *pomA* with wild-type *pomB*, and pNT1 encoding  
25 the wild-type *fliG*, were grown at 30°C for 4 hr, and whole-cell extracts were  
26 analyzed by immunoblotting with the anti-PomA antibody. (C) Expression of  
27 the mutant FliG proteins. NMB301 cells harboring two plasmids, pYA303  
28 encoding wild-type *pomAB*, and pMMB206 or pNT1 encoding the wild-type or  
29 the mutant *fliG*, were grown at 30°C for 4 hr, and whole-cell extracts were

30 analyzed by immunoblotting with the anti-FliG antibody.

31

32 **FIG. S3.** Motilities of *pomA/fliG* combined mutants in soft-agar plates (i).

33 Swimming abilities were observed in soft-agar plates of *pomA/fliG* combined  
34 mutants where highly conserved charged residues were substituted by single  
35 uncharged residues. Cells were incubated on VPG-soft-agar plates at 30°C for  
36 4.5 hr.

37

38 **FIG. S4.** Motilities of *pomA/fliG* combined mutants in soft-agar plates (ii).

39 Swimming abilities were observed in soft-agar plates of *pomA/fliG* combined  
40 mutants where charged residues were substituted by charge-reversed residues.  
41 Cells were incubated on VPG-soft-agar plates at 30°C for 5 hr.

42

43 **FIG. S5.** Motilities of *pomA/fliG* combined mutants in soft-agar plates (iii).

44 Swimming abilities were observed in soft-agar plates of *pomA/fliG* combined  
45 mutants where charged residues were substituted by charge-reversed residues.  
46 Cells were incubated on VPG-soft-agar plates at 30°C for 6 hr.

47

(A)

|                |     |                                                                             |          |      |
|----------------|-----|-----------------------------------------------------------------------------|----------|------|
| <i>Va PomA</i> | 56  | FGATK IAGKAFMF - KAD - - EPEDL IAK I VEMADAAR                               | <b>R</b> | KGGF |
| <i>So PomA</i> | 56  | LGAVK IAAKAF I F - KID - - RPEDL IEQSVTMADAAR                               | <b>R</b> | KGGF |
| <i>Bs MotP</i> | 62  | KKAPSVL KQAF I R - QED - - NVKDLVKTFVSLSDHAR                                | <b>R</b> | KHGL |
| <i>Ec MotA</i> | 55  | KGTLKALPLLFRRSKYTKAMYMDLLALLYRLMAKS                                         | <b>R</b> | QMGM |
| <i>Va LafT</i> | 55  | KEMRRQVPAT I KGPTEEHEYYMELMALLNLLLETAR                                      | <b>R</b> | NRGY |
| <i>So MotA</i> | 54  | I ASMKRFKWL I FPL - RT - - DLNERAEFL I E I AGDVR                            | <b>R</b> | KGGL |
| <i>Bs MotA</i> | 57  | KKVPTLFRVLFKENKQL - - TIEEL I PMFSEWAQLAR                                   | <b>R</b> | REGL |
|                |     | 96 97 99                                                                    |          |      |
| <i>Va PomA</i> | 93  | LAL <b>E</b> E - M - <b>E</b> INN - - - - - - - - - - - - - - - TFMQKGI DLL |          |      |
| <i>So PomA</i> | 93  | LAL <b>E</b> E - A - Q ISN - - - - - - - - - - - - - - - SFMQKAVDML         |          |      |
| <i>Bs MotP</i> | 99  | LSL <b>D</b> DQARE I KD - - - - - - - - - - - - - - - PFLKKGLLLA            |          |      |
| <i>Ec MotA</i> | 95  | FSL <b>E</b> RDI - ENPRESE I FASYPRILADSVMLDF IVDYLRLI                      |          |      |
| <i>Va LafT</i> | 95  | KFL <b>D</b> SHI - ESPEQSSMFLAYPTIAEDHRL I SFI TDNLRLM                      |          |      |
| <i>So MotA</i> | 91  | LSI <b>E</b> DKI - DQIDD - - - - - - - - - - - - - - - PFLHKGLELL           |          |      |
| <i>Bs MotA</i> | 95  | LAL <b>E</b> AS I - EDVDD - - - - - - - - - - - - - - - AFLKNGLSMA          |          |      |
|                |     | 128 133~136                                                                 |          |      |
| <i>Va PomA</i> | 114 | VDGHD - ADVVRAALK <b>K</b> D IALT <b>D</b> ERHTQGTGVFRAFGD                  |          | 148  |
| <i>So PomA</i> | 114 | VDGHD - GEVVRAALE <b>K</b> D ILT <b>D</b> EDRHRIGIA I FRAFAD                |          | 148  |
| <i>Bs MotP</i> | 122 | IDGWD - EET IRLVMDSE I AAMEERHRKGRRVFEKAGE                                  |          | 156  |
| <i>Ec MotA</i> | 135 | ISGHMNTFE I EALMDEE I ETHESEAEVPANSLALVGD                                   |          | 170  |
| <i>Va LafT</i> | 135 | AMGQMSPHELEGLLEQE I EA IQNEMLLPSRSLQRTAE                                    |          | 170  |
| <i>So MotA</i> | 114 | VDGYE - KDN IVE I LEKE I EFEQHG I EQTVKVYEAMGG                              |          | 148  |
| <i>Bs MotA</i> | 118 | VDGQS - AEF I RDIMTEE I VEAME <b>D</b> DRHQAGAA I FTQAGT                    |          | 152  |

(B)

|                |     |                                                                                             |          |              |
|----------------|-----|---------------------------------------------------------------------------------------------|----------|--------------|
| <i>Va FliG</i> | 214 | GGLKAAAE I MNYLDNNVEGLLMEQ I RDQDEDMATQ I QDLM                                              |          |              |
| <i>So FliG</i> | 210 | GGLKAAAN I MNYLDTGVESQLMETMRE TDEEMAQQ I QDLM                                               |          |              |
| <i>Bs FliG</i> | 198 | GG I EAVVEVLNGVDRGTEKT I LDSLE I QDPDLAEE I KCRM                                            |          |              |
| <i>Ec FliG</i> | 194 | GGVRTAAE I I NLMKTQQEEAV I TAVRE FDGE LAQK I I DEM                                          |          |              |
| <i>Tm FliG</i> | 196 | GG I DTAAE I MNLDRTTEKK I MDKLVQENPE LADE I RRRM                                            |          |              |
| <i>Aa FliG</i> | 197 | EGTAVAAE LNTLDKETREL I LQS I GQEDPLLEERI REKM                                               |          |              |
|                |     | 284                                                                                         |          |              |
| <i>Va FliG</i> | 254 | FVFENLVEVDDQGI QKLLRDVPQDVLQKAL                                                             | <b>K</b> | KGADDS LREK  |
| <i>So FliG</i> | 250 | FVFENL I DVDDRGI QTLLREVQQDVLMKAL                                                           | <b>K</b> | KGADDQLKDK   |
| <i>Bs FliG</i> | 238 | FVFEDI VTLDNRA I QRVI RDVENDDL LLSL                                                         | <b>K</b> | KVASEEVEKE I |
| <i>Ec FliG</i> | 234 | FLFENLVDDRS I QRLLQEVDSESLL I AL                                                            | <b>K</b> | KGAEQP LREK  |
| <i>Tm FliG</i> | 236 | FVFEDI LKLDPRS I QLVLREVDTRDLALAL                                                           | <b>K</b> | KGASDE LKEK  |
| <i>Aa FliG</i> | 237 | FTFEDI RKLSDRDI I E I LKVVDKNTLM I ALLGAPEDI KQK                                            |          |              |
|                |     | 300 301 304 308 309 311 317                                                                 |          |              |
| <i>Va FliG</i> | 294 | V FKNMS <b>K</b> RAA <b>E</b> MMR <b>D</b> D I <b>E</b> AMPPV <b>R</b> VADVEAAQKE I LA I AR |          |              |
| <i>So FliG</i> | 290 | I LGNMS <b>K</b> RAA <b>E</b> LLR <b>D</b> DL <b>E</b> AMGP I R I SEVE I AQKE I LSI AR      |          |              |
| <i>Bs FliG</i> | 278 | V FNNMSQRMV E T FKEE M E FMGPVRLKDVEEAQSR I VS I VR                                         |          |              |
| <i>Ec FliG</i> | 274 | FLRNMSQRAA D I LRDDL ANRGPVRLS QVENEQA I LL I VR                                            |          |              |
| <i>Tm FliG</i> | 276 | I FKNMS <b>K</b> RAAALL <b>K</b> DELE YMGPVRLKDVEEAQK I I NI I R                            |          |              |
| <i>Aa FliG</i> | 277 | FLSNMS <b>K</b> RAAKLFL <b>E</b> DM <b>E</b> ALGPV <b>K</b> KSE I EKAQRQVVNI I R            |          |              |
| <i>Va FliG</i> | 334 | RMADAGELMLSGGA - DEFL -                                                                     |          | 351          |
| <i>So FliG</i> | 330 | RLSDSGE IMLGGGGGDEFL -                                                                      |          | 348          |
| <i>Bs FliG</i> | 318 | KLEEAGE I V I ARGGGDD I I V                                                                 |          | 337          |
| <i>Ec FliG</i> | 314 | RLAETGEMV I GSGE - DTYY -                                                                   |          | 321          |
| <i>Tm FliG</i> | 316 | RLEEAGE I V I ARGGGEEL I M                                                                  |          | 335          |
| <i>Aa FliG</i> | 317 | KMI DEGK I E I GD - - - - -                                                                 |          | 328          |

Fig. S1. Takekawa *et al.*

(A)

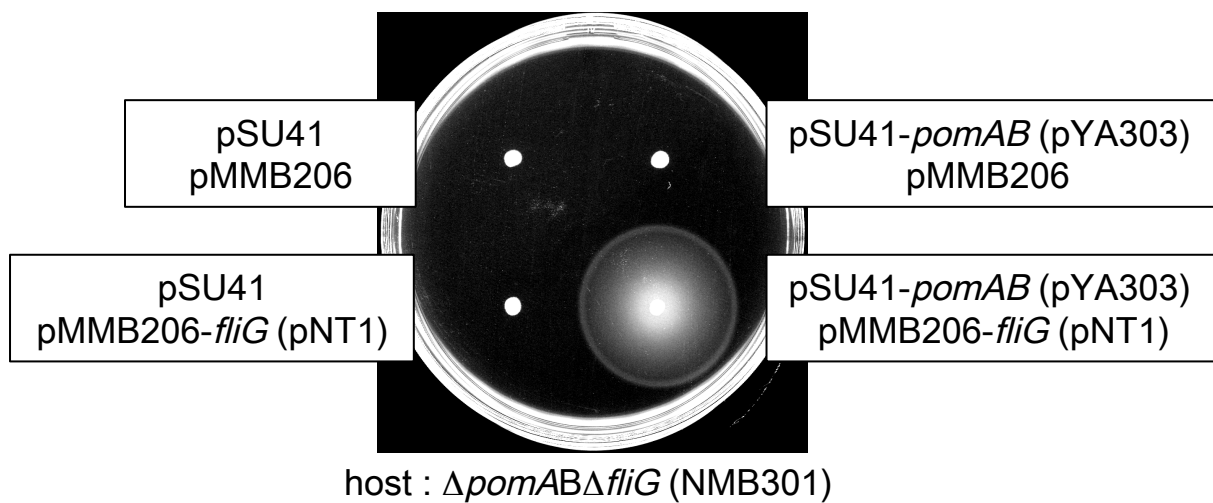

(B)

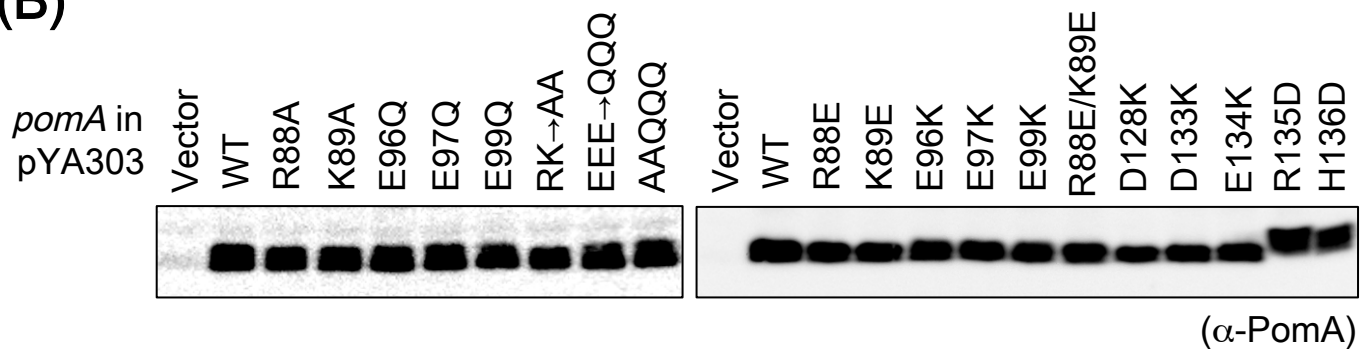

(C)

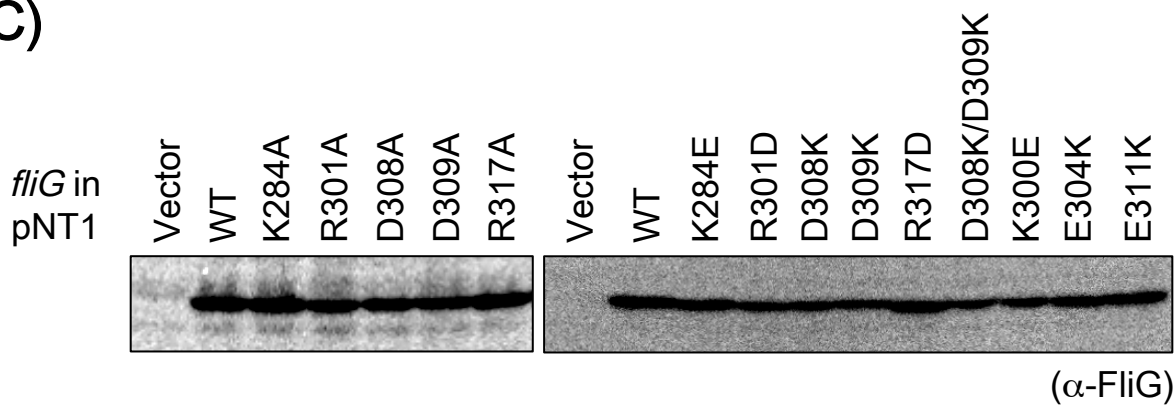

Fig. S2. Takekawa *et al.*

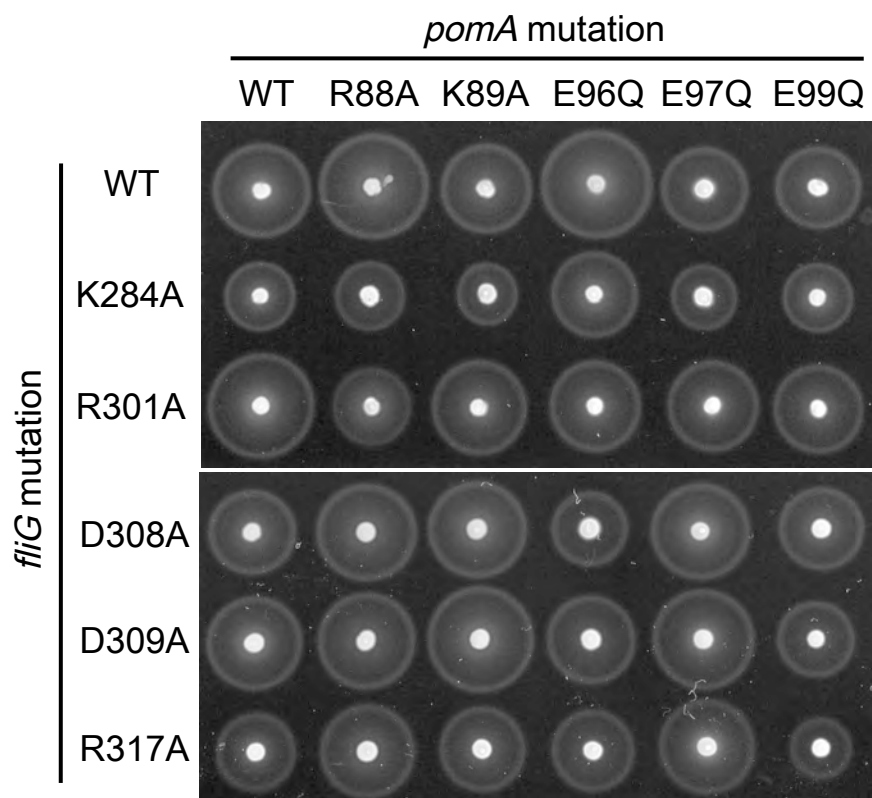

Fig. S3. Takekawa *et al.*

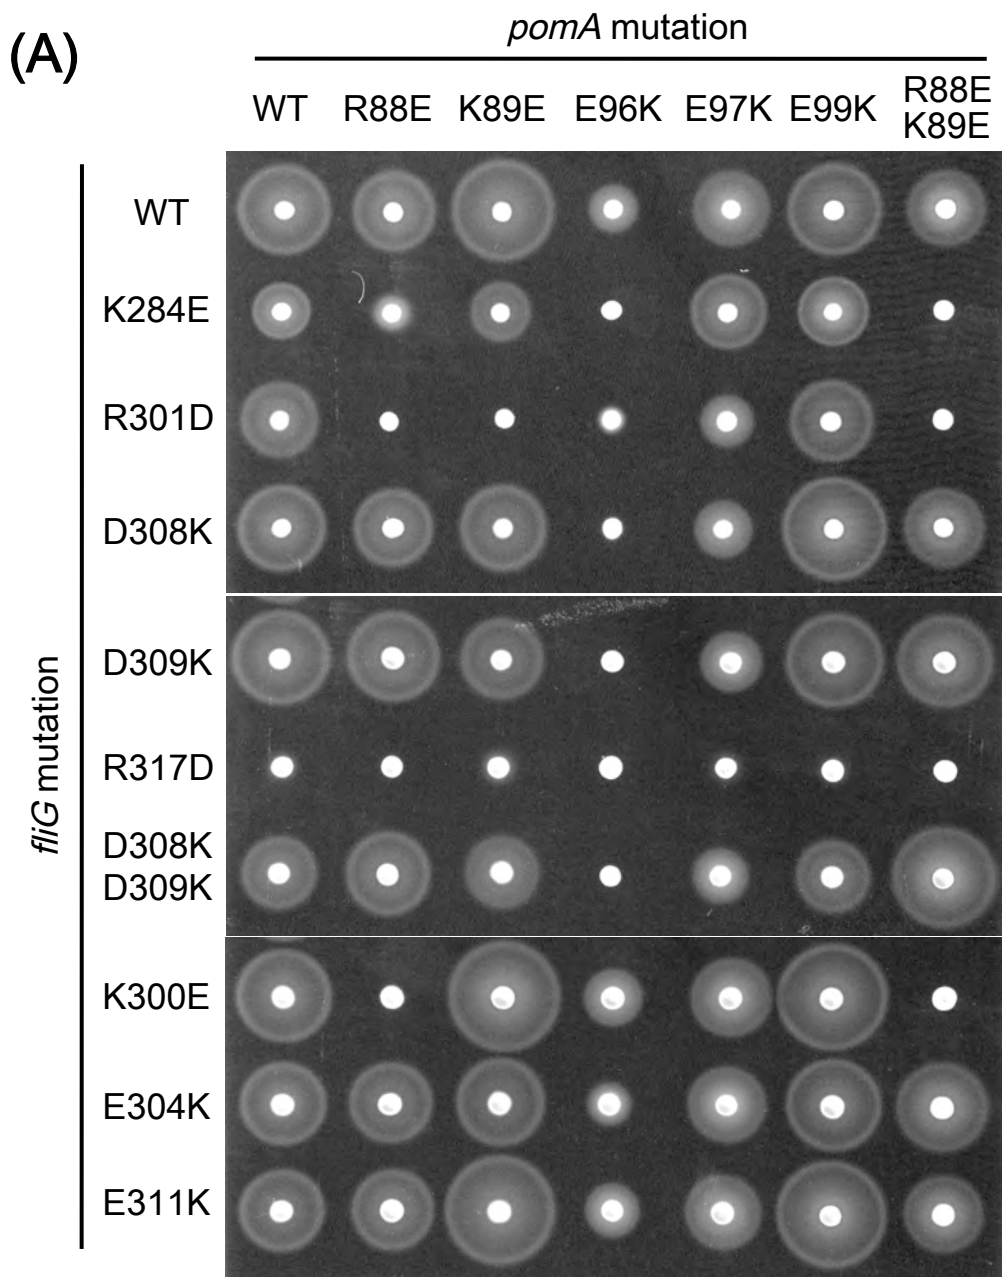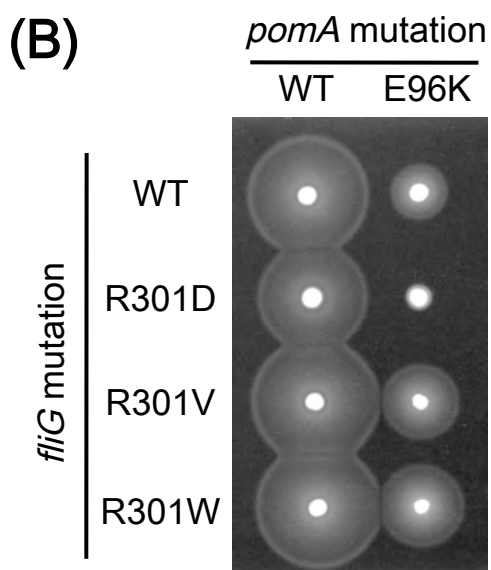

Fig. S4. Takekawa *et al.*

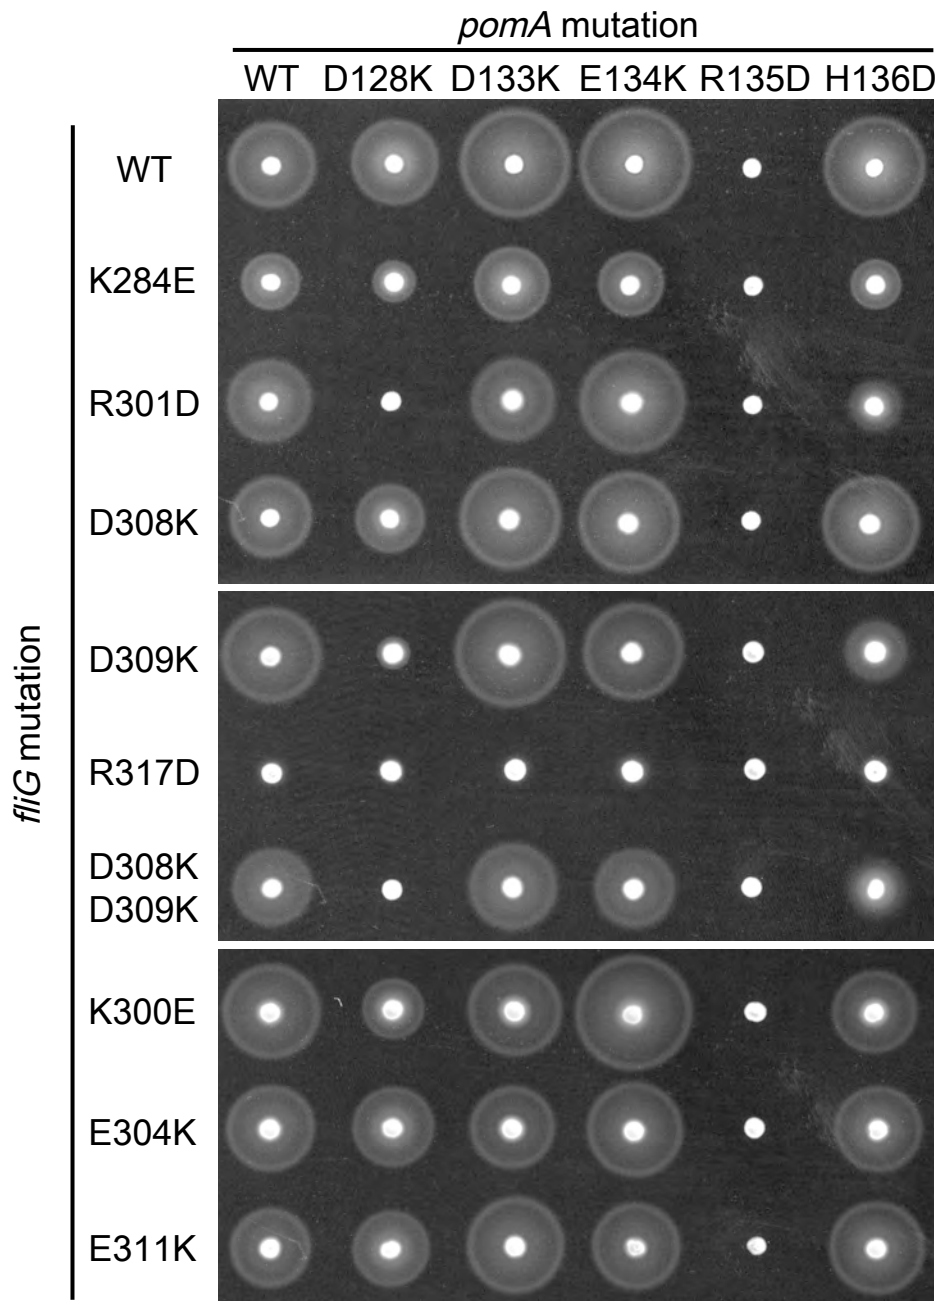

Fig. S5. Takekawa *et al.*
